## Correction: 6-Shogaol attenuates LPS-induced inflammation in BV2 microglia cells by activating PPAR- $\gamma$

**Qinghe Han<sup>2</sup>, Qinghai Yuan<sup>2</sup> and Guanghong Xie<sup>1</sup>**

<sup>1</sup> College of Veterinary Medicine, Jilin University, Changchun 130062, China

<sup>2</sup> The Second Hospital of Jilin University, Changchun 130000, China

**Published:** June 08, 2018

**Copyright:** Han et al. This is an open-access article distributed under the terms of the Creative Commons Attribution License 3.0 (CC BY 3.0), which permits unrestricted use, distribution, and reproduction in any medium, provided the original author and source are credited.

**This article has been corrected:** The correct author information and affiliations are given below:

**Qinghe Han<sup>2</sup>, Qinghai Yuan<sup>2</sup> and Guanghong Xie<sup>1</sup>**

<sup>1</sup> College of Veterinary Medicine, Jilin University, Changchun 130062, China

<sup>2</sup> The Second Hospital of Jilin University, Changchun 130000, China

Original article: Oncotarget. 2017; 8:42001-42006. <https://doi.org/10.18632/oncotarget.16719>
